# Supplementary material for: A comprehensive transcriptional portrait of human cancer cell lines
Source: Springer Nature journal article supplement (doi:10.1038/nbt.3080), 2014-12-08
Supplement: 41587_2015_BFnbt3080_MOESM14_ESM.pdf [file 41587_2015_BFnbt3080_MOESM14_ESM.pdf]

## CORRECTION NOTICE

*Nat. Biotechnol.* doi:10.1038/nbt.3080; 8 December 2014

### A comprehensive transcriptional portrait of human cancer cell lines

Christiaan Klijn, Steffen Durinck, Eric W Stawiski, Peter M Haverty, Zhaoshi Jiang, Hanbin Liu, Jeremiah Degenhardt, Oleg Mayba, Florian Gnad, Jinfeng Liu, Gregoire Pau, Jens Reeder, Yi Cao, Kiran Mukhyala, Suresh K Selvaraj, Mamie Yu, Gregory J Zynda, Matthew J Brauer, Thomas D Wu, Robert C Gentleman, Gerard Manning, Robert L Yauch, Richard Bourgon, David Stokoe, Zora Modrusan, Richard M Neve, Frederic J de Sauvage, Jeffrey Settleman, Somasekar Seshagiri & Zemin Zhang

In the version of the Supplementary Data 1, 2 and 4 originally posted online, a column containing necessary identifiers was omitted in each. The error has been corrected in this file as of 26 January 2015.

# A COMPREHENSIVE TRANSCRIPTIONAL PORTRAIT OF HUMAN CANCER CELL LINES

## Supplemental Information

Christiaan Klijn<sup>1</sup>, Steffen Durinck<sup>2</sup>, Eric Stawiski<sup>1,2</sup>, Peter M. Haverty<sup>1</sup>, Zhaoshi Jiang<sup>1</sup>, Hanbin Liu<sup>1</sup>, Jeremiah Degenhardt<sup>1</sup>, Oleg Mayba<sup>1</sup>, Florian Gnad<sup>1</sup>, Jinfeng Liu<sup>1</sup>, Gregoire Pau<sup>1</sup>, Jens Reeder<sup>1</sup>, Yi Cao<sup>1,3</sup>, Kiran Mukhyala<sup>1</sup>, Suresh K. Selvaraj<sup>3</sup>, Mamie Yu<sup>3</sup>, Gregory J. Zynda<sup>1</sup>, Matthew Brauer<sup>1</sup>, Thomas D. Wu<sup>1</sup>, Robert C. Gentleman<sup>1</sup>, Gerard Manning<sup>1</sup>, Robert L. Yauch<sup>3</sup>, Richard Bourgon<sup>1</sup>, David Stokoe<sup>3</sup>, Zora Modrusan<sup>2</sup>, Richard M. Neve<sup>3</sup>, Frederic J. de Sauvage<sup>2</sup>, Jeffrey Settleman<sup>3,\*</sup>, Somasekar Seshagiri<sup>2,\*</sup>, Zemin Zhang<sup>1,\*</sup>

1. Department of Bioinformatics and Computational Biology, Genentech Inc., South San Francisco, CA 94080, USA
2. Department of Molecular Biology, Genentech Inc., South San Francisco, CA 94080, USA
3. Department of Discovery Oncology, Genentech Inc., South San Francisco, CA 94080, USA

## Table of Contents

|                                                                                                                                                         |    |
|---------------------------------------------------------------------------------------------------------------------------------------------------------|----|
| Table of Contents .....                                                                                                                                 | 2  |
| Supplemental Figures.....                                                                                                                               | 4  |
| Supplementary Figure 1 – Data generation and SNP-array GISTIC analysis .....                                                                            | 4  |
| Supplementary Figure 2 – Cell line and gene expression overlap with previous studies                                                                    | 5  |
| Supplementary Figure 3 – Gene expression analysis of cancer cell lines.....                                                                             | 6  |
| Supplementary Figure 4 – Sample-by-sample gene expression correlation networks ...                                                                      | 7  |
| Supplementary Figure 5 – Hierarchical clustering of lincRNA genes associated with<br>EMT. ....                                                          | 8  |
| Supplementary Figure 6 – Gene expression correlation reveals co-regulation of MET,<br>EGFR, ITGA3 and EPHA2 expression.....                             | 9  |
| Supplementary Figure 7 – MET and EGFR gene expression correlation is conserved<br>across cell line tissues .....                                        | 10 |
| Supplementary Figure 8 – EGFR, MET, EPHA2 and ITGA3 show gene expression<br>regulation by MET and EGFR signaling.....                                   | 11 |
| Supplementary Figure 9 - Viral sequences in cell lines .....                                                                                            | 12 |
| Supplementary Figure 10 – Integration of human papillomavirus near the MYC gene in<br>the HeLa cell line co-localizes with copy number breakpoint. .... | 13 |
| Supplementary Figure 11 – Sequence depth and number of fusion candidates found<br>are correlated.....                                                   | 14 |
| Supplementary Figure 12 – Comparison of GNE fusions detected in cell lines MCF-7<br>and BT-474 with two published studies .....                         | 15 |
| Supplementary Figure 13 – Fusions involving Anaplastic Lymphoma Kinase (ALK) found<br>in cancer cell lines .....                                        | 16 |
| Supplementary Figure 14 – Kinase gene fusions in amplified regions are more likely to<br>have a non-complete kinase domain .....                        | 17 |
| Supplementary Figure 15 – Overview of FGFR2 and FGFR3 fusion genes found in cell<br>lines with complete or partial kinase domain. ....                  | 18 |
| Supplementary Figure 16 – Overview of RNA-seq variant filtering pipeline.....                                                                           | 19 |
| Supplementary Figure 17 – RNA-seq derived high confidence gene mutations.....                                                                           | 20 |
| Supplementary Figure 18 – Pathway-based response prediction outperforms single<br>gene predictors. ....                                                 | 21 |
| Supplemental Tables.....                                                                                                                                | 22 |
| Supplementary Table 3 – Resolution of genomic concordance among cell lines .....                                                                        | 22 |
| Supplementary Table 5 – Significantly differentially expressed lincRNAs between<br>Epithelial and Mesenchymal cell lines.....                           | 27 |
| Supplementary Table 9 – TCGA samples analyzed for fusions.....                                                                                          | 28 |

|                                                                                                                             |    |
|-----------------------------------------------------------------------------------------------------------------------------|----|
| Supplementary Table 12 – Cancer-related pathways with member genes that are known to be functionally altered in cancer..... | 29 |
| Supplementary Notes.....                                                                                                    | 30 |
| Supplementary note 1: PICNIC algorithm adjustments.....                                                                     | 30 |



## Supplemental Figures

### Supplementary Figure 1 – Data generation and SNP-array GISTIC analysis

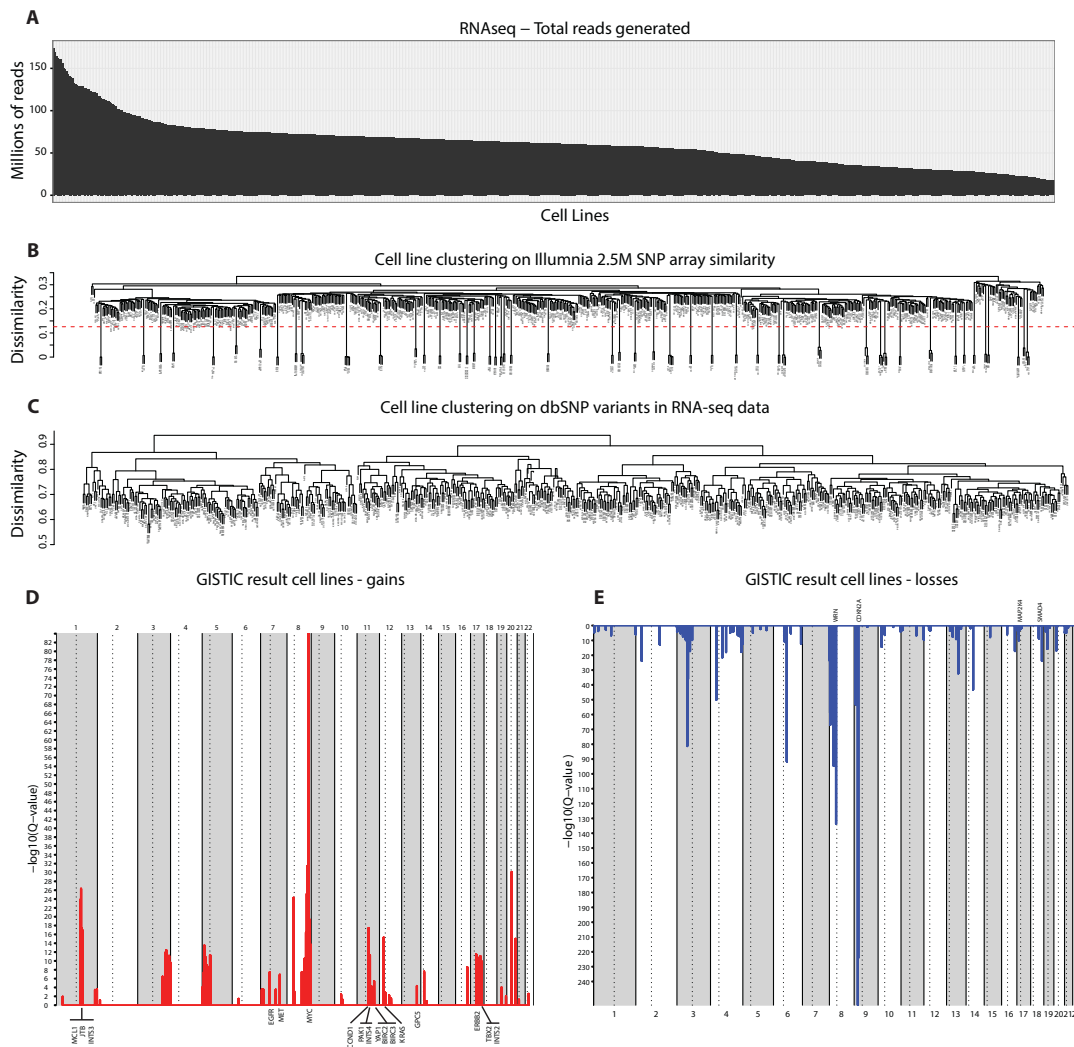

**A.** Histogram of total RNA-Seq reads generated per cell line. **B.** Hierarchical clustering of 676 cancer cell lines based on SNP concordance, as in Figure 1. **C.** Concordance of 610 cell lines remaining after SNP array filtering, using variants detected from RNA-Seq found in the dbSNP database version 132. GISTIC results for either copy number gains (**D.**) or copy number losses (**E.**). The y-axis shows the GISTIC q value and the x-axis the genomic location. Candidate driver genes are annotated.

*Supplementary Figure 2 – Cell line and gene expression overlap with previous studies*

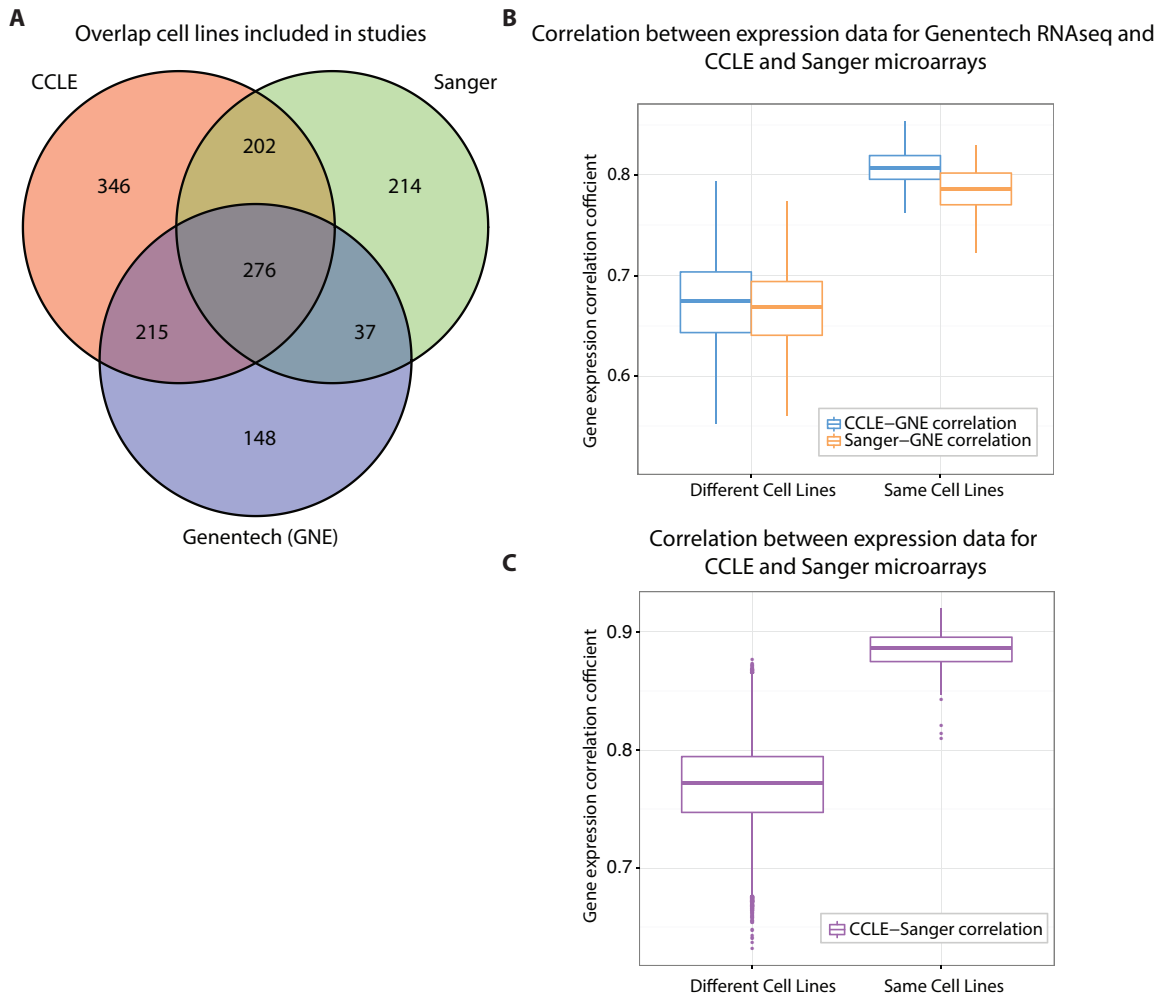

**A.** Venn diagram showing the cell line inclusion in our study (GNE) and two previously published studies. These overlaps were based on the analysis of Haibe-Kains (Nature, 2013), with 5 additional overlapping lines between CCLE and Sanger that were missed by Haibe-Kains et al. **B.** Boxplots showing gene expression correlation coefficients for the 276 overlapping cell lines between the CCLE and GNE (blue) and the Sanger lines and GNE (yellow). **C.** Boxplots showing gene expression correlation coefficients for 478 overlapping cell lines between the CCLE and Sanger lines.

Supplementary Figure 3 – Gene expression analysis of cancer cell lines

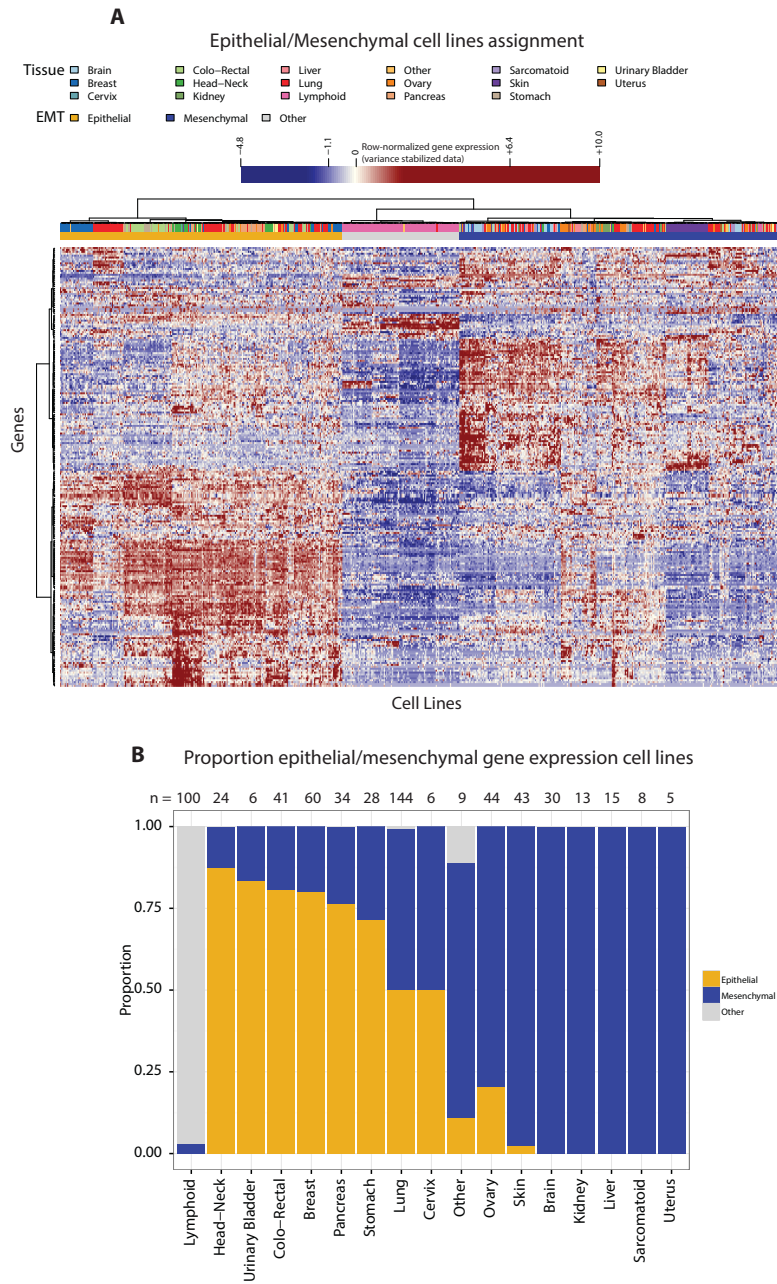

**A.** Hierarchical clustering of 610 cell lines based on gene expression values derived from RNA-Seq data. Gene expression was represented as variance-stabilized data from the DEseq package in the R programming language, established from gene-based read counts. We used the 1000 most variable genes as determined by inter-quartile range. Clustering was done using Euclidean distance and Ward linkage. Colors represent the cell line tissue of origin. **B.** Proportional bar graph showing the distribution over cell line tissues of epithelial, mesenchymal and non-scoring cell lines as assigned according to an epithelial-to-mesenchymal gene expression signature

## Supplementary Figure 4 – Sample-by-sample gene expression correlation networks

Sample-by-sample correlation network cancer cell lines

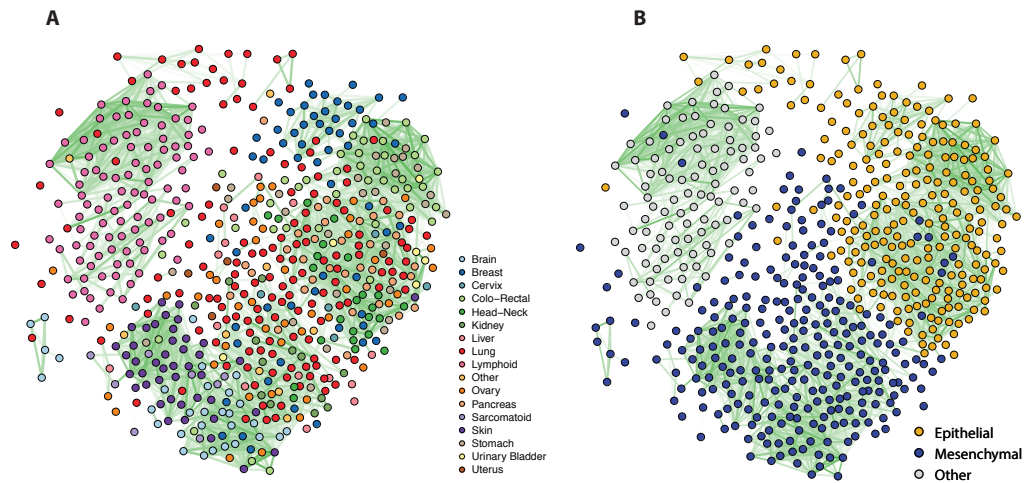

Networks derived from the correlation matrix of the 1000 most variable genes (as determined by inter-quartile range). Edges are shown for correlation values  $> .75$  and higher edge intensity signifies higher correlation. The Fruchterman-Reingold algorithm was used to determine the network layout. Colors of the nodes denotes either tissue of origin (**A**) or epithelial (yellow) or mesenchymal (blue) gene expression state as assigned according to an epithelial-to-mesenchymal gene expression signature (**B**).

## Supplementary Figure 5 – Hierarchical clustering of lincRNA genes associated with EMT.

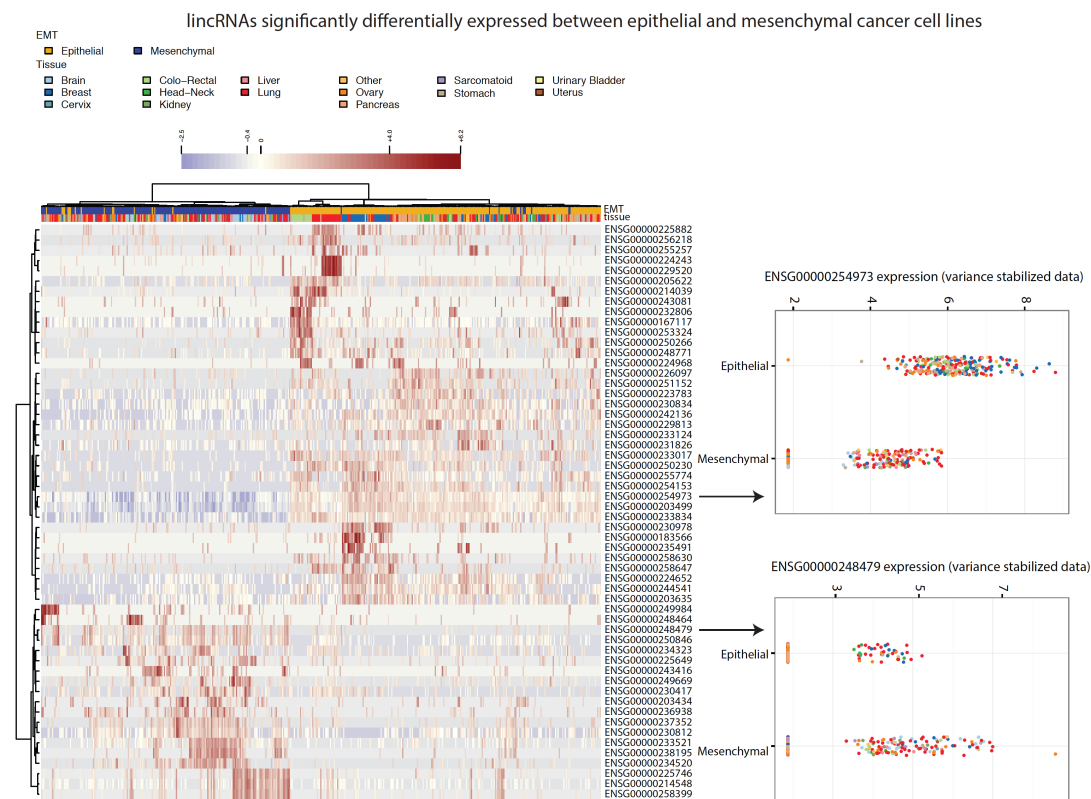

LincRNA genes found differentially expressed between epithelial-type cell lines and mesenchymal-type cell lines are used for hierarchical clustering. Cell lines that could not be categorized as either epithelial or mesenchymal were excluded from this representation. Two examples of lincRNAs are highlighted with either expression predominantly in mesenchymal cells (ENSG00000248479) or in epithelial cells (ENSG00000254973) of various tissues of origin. Both genes encode lincRNAs for which there is no functional information.

Supplementary Figure 6 – Gene expression correlation reveals co-regulation of *MET*, *EGFR*, *ITGA3* and *EPHA2* expression

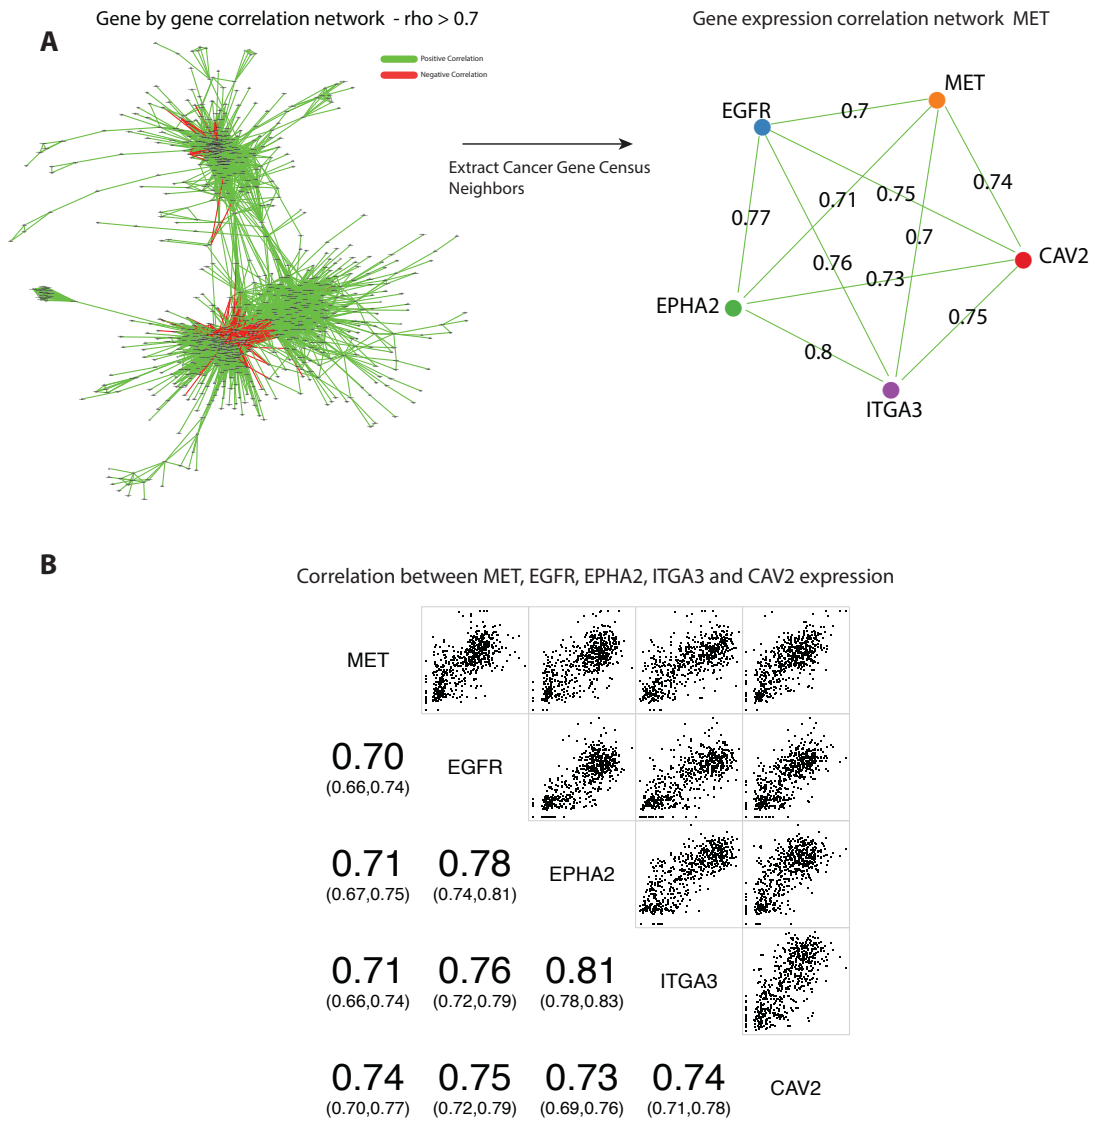

All gene expression values are variance stabilized data values as determined by the *DESeq* R package. **A**. The largest connected network of the gene expression correlation. Only edges with a correlation of  $> 0.7$  or  $< -0.7$  are shown, with green edges indicating positive correlation and red edges indicating negative correlation. The smaller network shows the direct neighbors of the *MET* gene. Correlation coefficients are plotted onto the edges. **A**. Correlation matrix showing the pair-wise gene expression for *MET*, *EGFR*, *EPHA2*, *ITGA3* and *CAV2* over all cell lines. Numbers in the lower left panels indicate the Spearman correlation coefficients and their 95% confidence interval as determined by the *cor.test* function in R.

Supplementary Figure 7 – MET and EGFR gene expression correlation is conserved across cell line tissues

Correlation between MET and EGFR per tissue

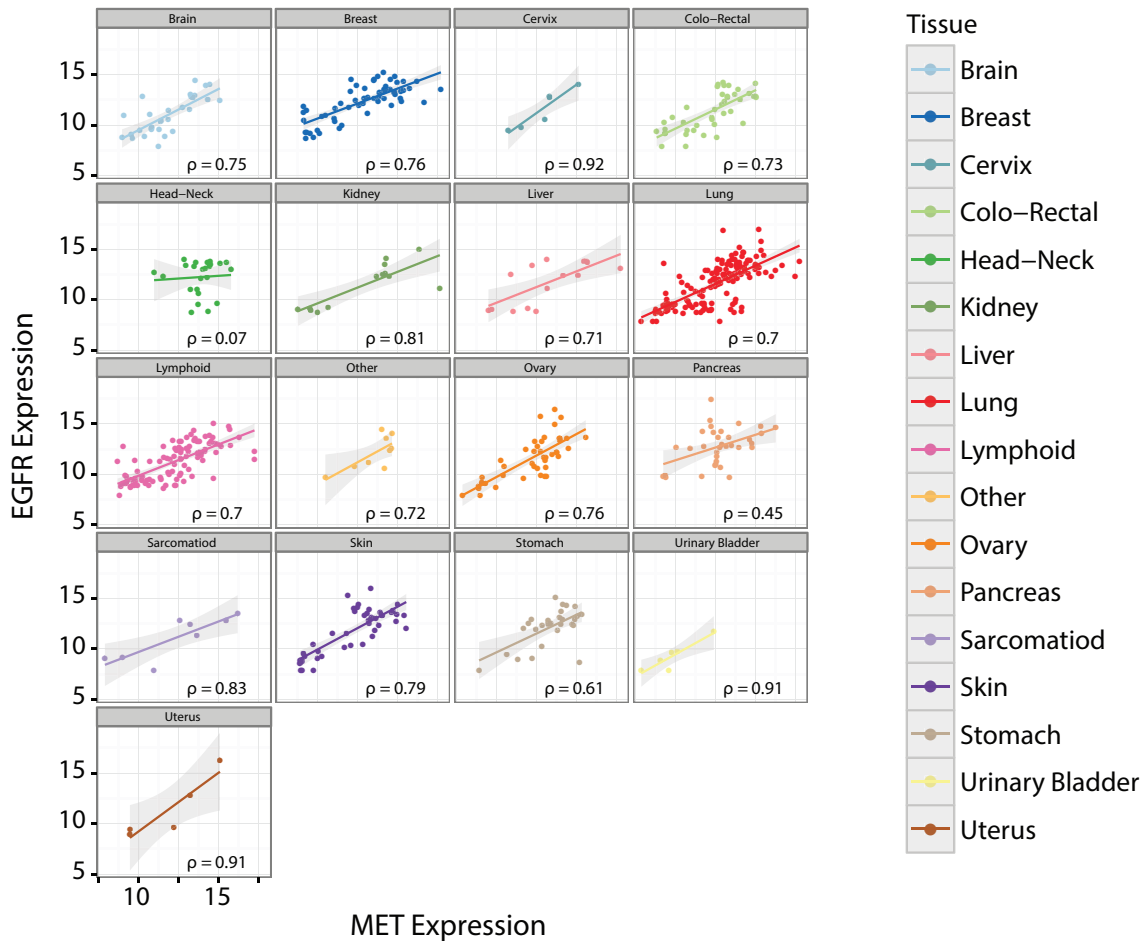

Scatterplots, separated per tissue, showing the expression of *MET* on the x axis and the expression of *EGFR* on the y axis. Gene expression values are variance stabilized data values as determined by the *DESeq* R package.

Supplementary Figure 8 – EGFR, MET, EPHA2 and ITGA3 show gene expression regulation by MET and EGFR signaling.

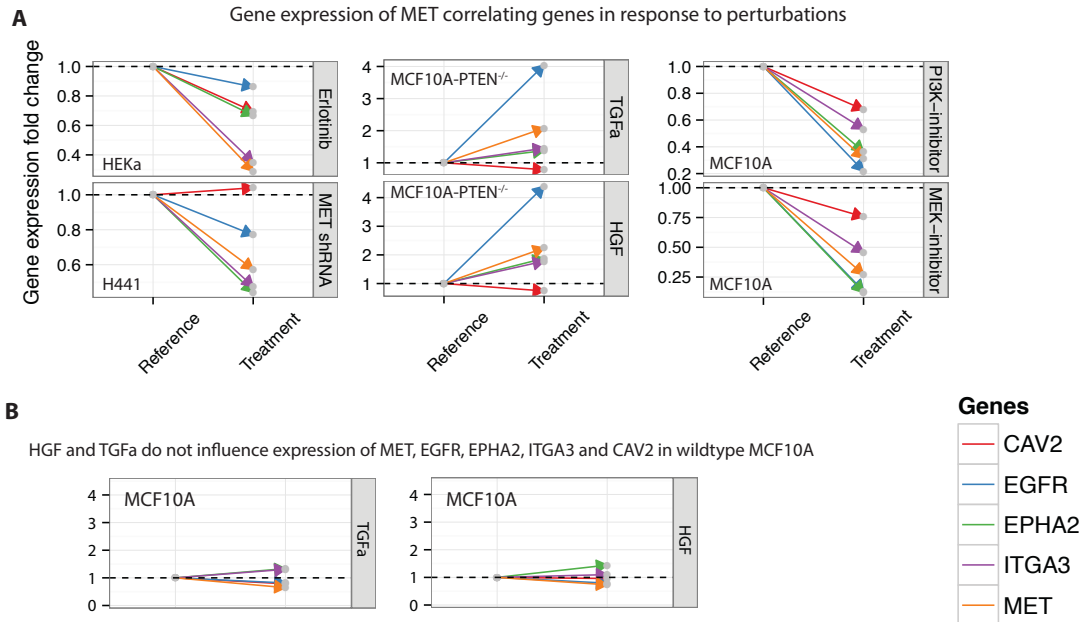

**A.** Changes in transcript expression of MET, EGFR, ITGA3, EPHA2 and CAV2 by perturbation with the indicated compounds and shRNAs. The cell line in which the experiment was performed is annotated in the graph area. See also Supplementary Figure 3. **B.** Arrow charts representing the fold change of gene expression values of *MET*, *EGFR*, *ITGA3*, *EPHA2* and *CAV2* before and after perturbation with either an EGFR ligand (TGf $\alpha$ ) or a MET ligand (HGF) in MCF10A cell lines carrying a wild-type *PTEN* gene.



Supplementary Figure 9 - Viral sequences in cell lines

Presence of viral sequences in cancer cell lines

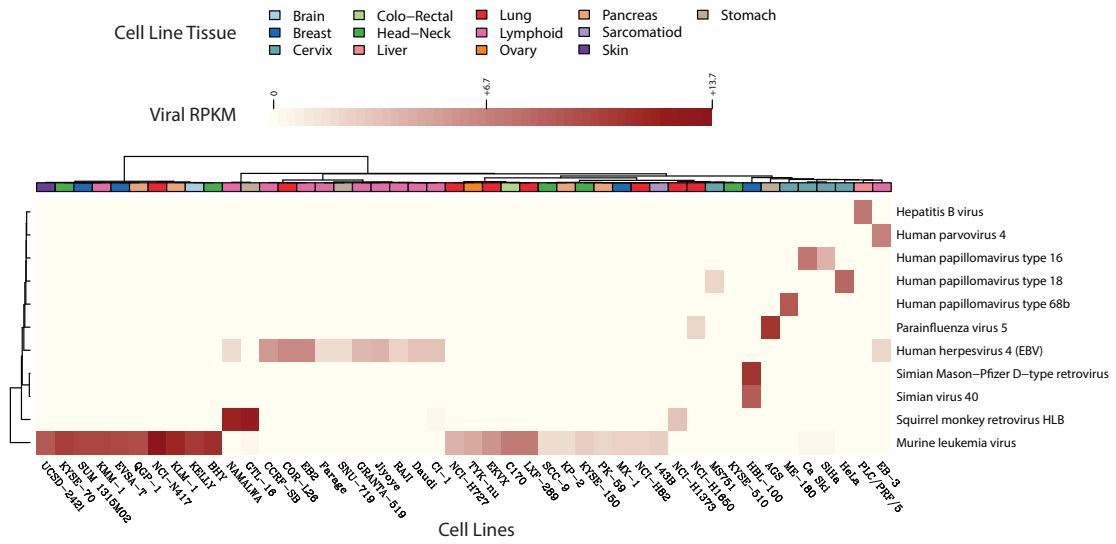

Heatmap showing viral RPKM (Reads Per Kilobase per Million mapped reads) within human cell lines. Rows and columns are clustered using Euclidean distance and Ward's linkage. Tissue of origin groups are color-coded above the columns.

*Supplementary Figure 10 – Integration of human papillomavirus near the MYC gene in the HeLa cell line co-localizes with copy number breakpoint.*

HeLa HPV integration at DNA copy number breakpoint

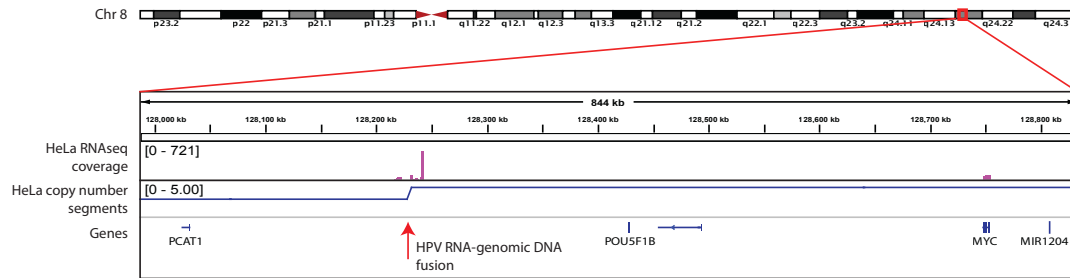

Integration of HPV at the *MYC* genomic locus in the HeLa cell line. The first row shows the coverage of mapped RNA-Seq reads, the second row shows absolute copy number segments called using the PICNIC from Illumina 2.5 SNP array data. The arrow indicates the location of the detection of human papillomavirus type 18 RNA fused to transcribed human genomic DNA.

Supplementary Figure 11 – Sequence depth and number of fusion candidates found are correlated

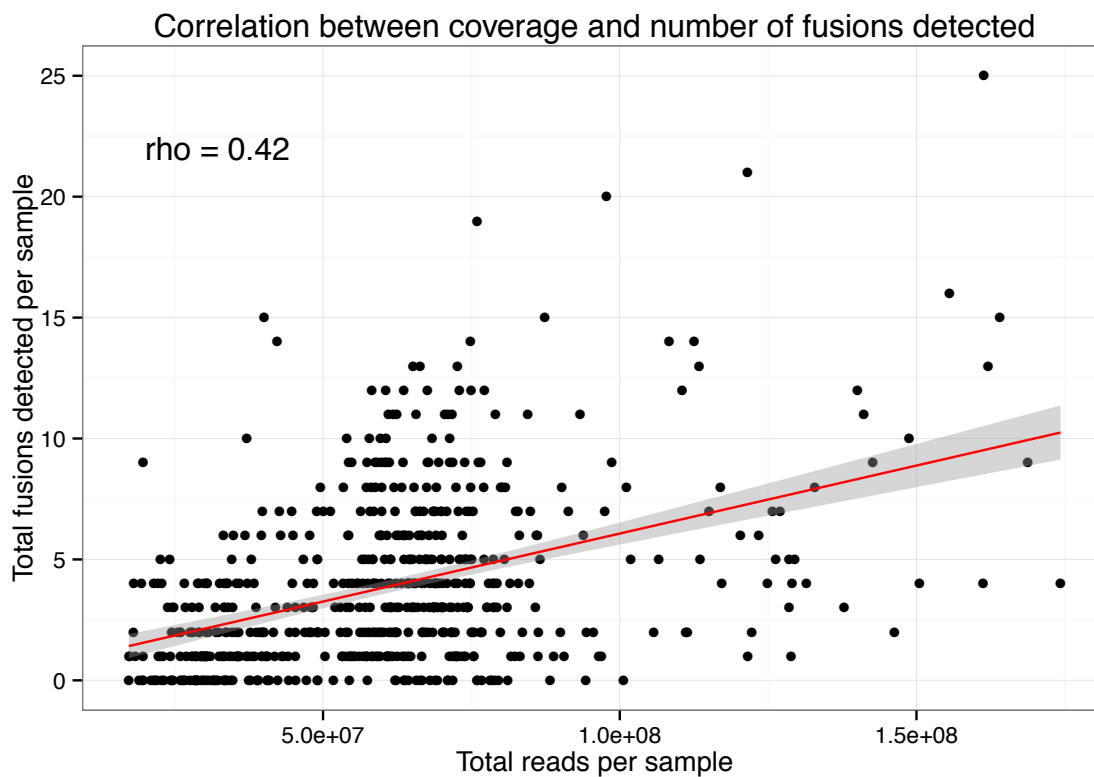

Plotted are the sequence depth (x-axis) and the number of fusion candidates found (y-axis). The red line indicates a linear regression, and the gray shaded area indicates the 95% confidence interval for this regression. Linear regression was applied as implemented in the ggplot2 package for the R programming language.

Supplementary Figure 12 – Comparison of GNE fusions detected in cell lines MCF-7 and BT-474 with two published studies

Fusions found in cell lines MCF-7 and BT-474 in three studies

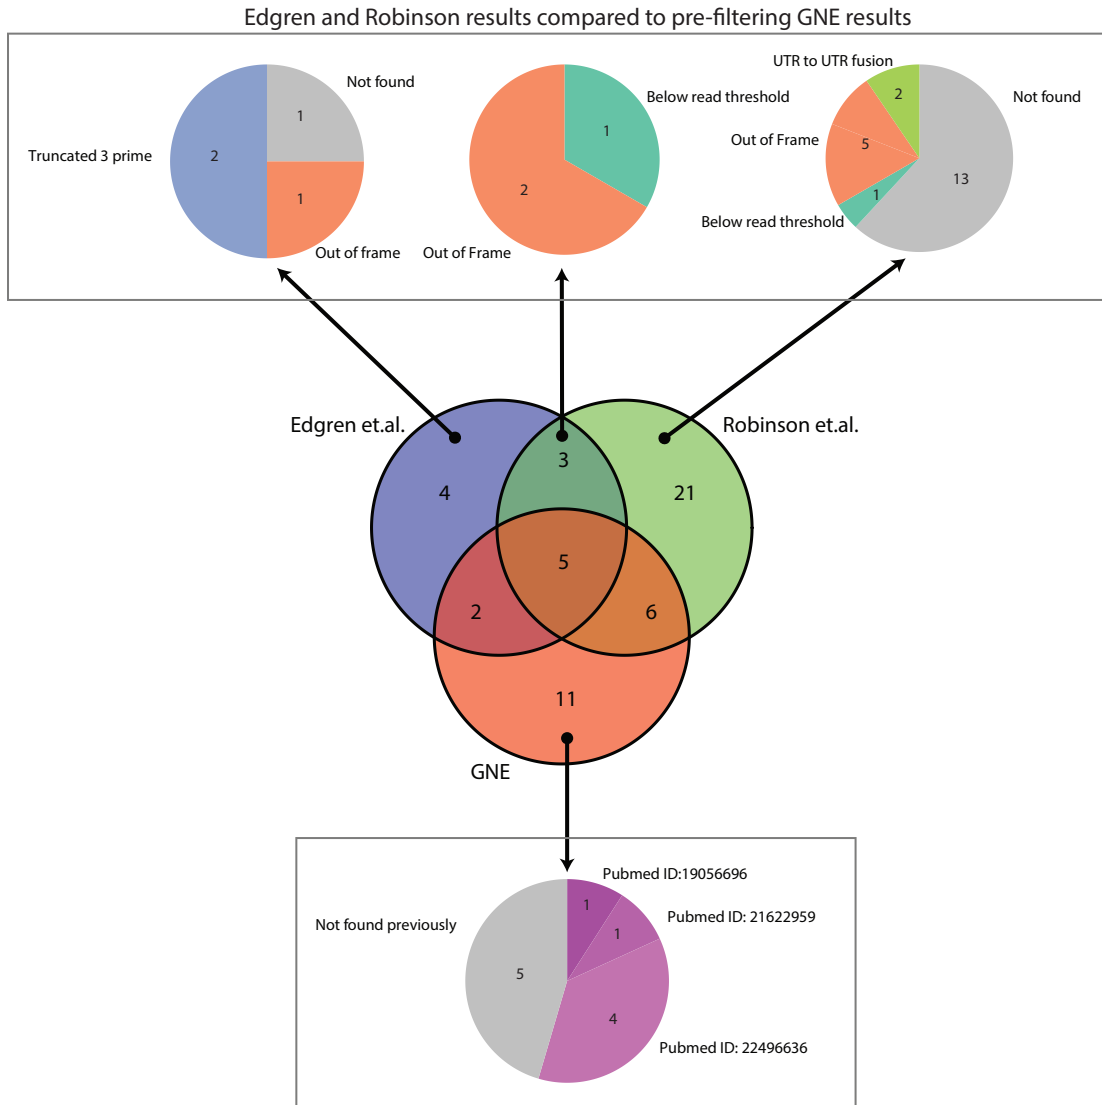

GNE-specific fusions compared to additional studies on MCF-7 and BT-474

The Venn diagram in the middle of the figure depicts the overlap of fusions found in our study, after the filtering pipeline, compared with published fusion results from two previously published studies: Edgren *et al.* 2011, *Genome Biology* and Robinson *et al.* 2011, *Nature Medicine*. For the Venn subsets that contain fusions specific to the Edgren and Robinson studies, pie graphs are shown in the top panel detailing whether these fusions were detected in our study, but removed by filtering (colored slices), or not detected (gray slice). The bottom panel shows a pie graph for the fusions specific to our study. The colored slices indicate that this fusion was found in additional published studies (for which the Pubmed identification number is shown) or was not reported previously (gray slice).

Supplementary Figure 13 – Fusions involving Anaplastic Lymphoma Kinase (ALK) found in cancer cell lines

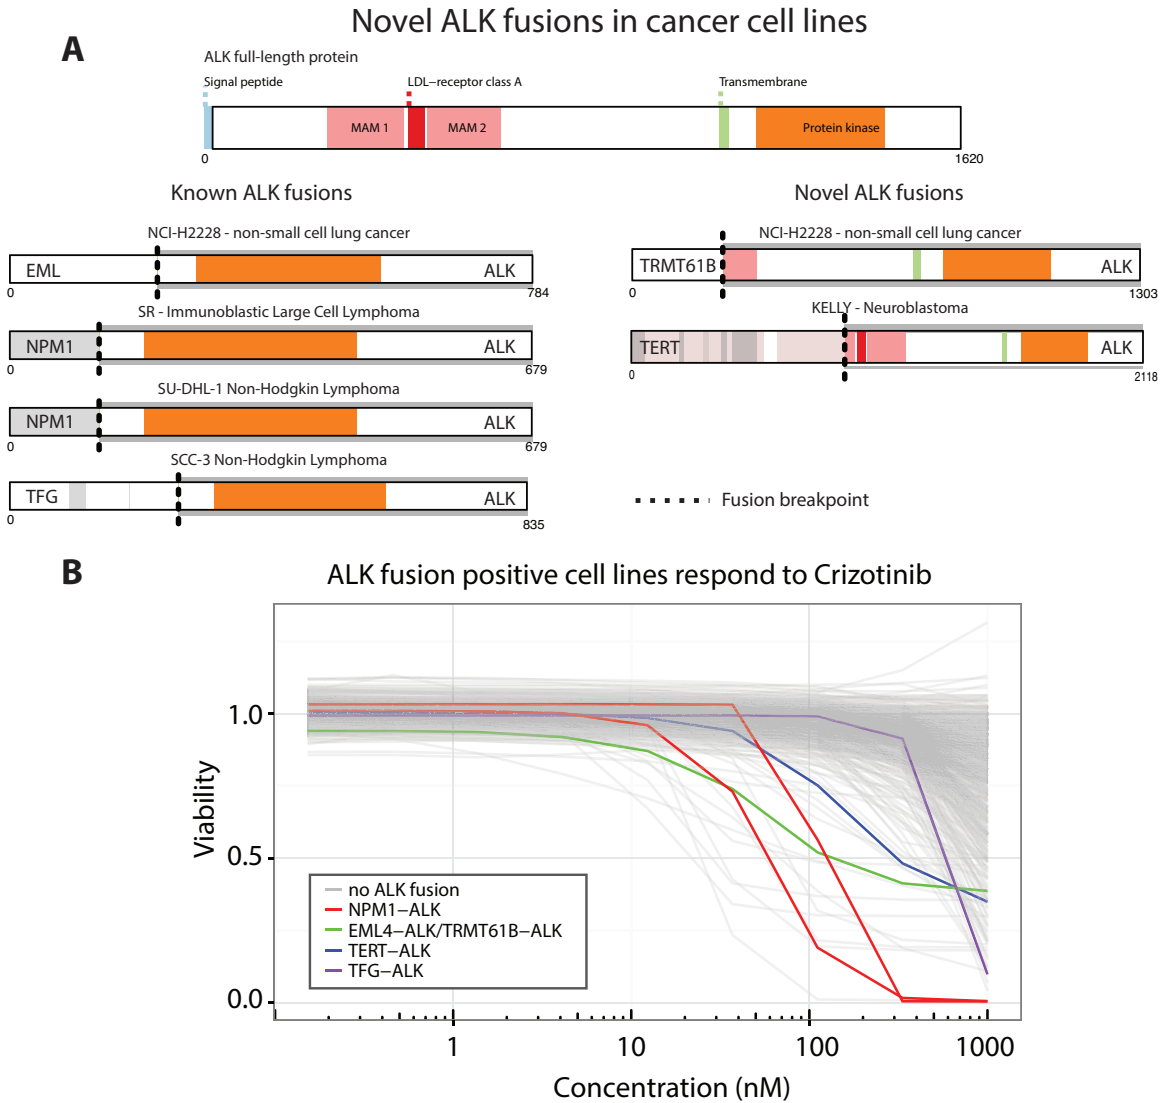

A. Schematic representation of predicted fusion proteins involving ALK. All fusion proteins are predicted to be in-frame and contain a fully intact protein kinase domain. B. Cell line drug response curves for crizotinib treatment. ALK fusion-positive cell lines are indicated in color.

*Supplementary Figure 14 – Kinase gene fusions in amplified regions are more likely to have a non-complete kinase domain*

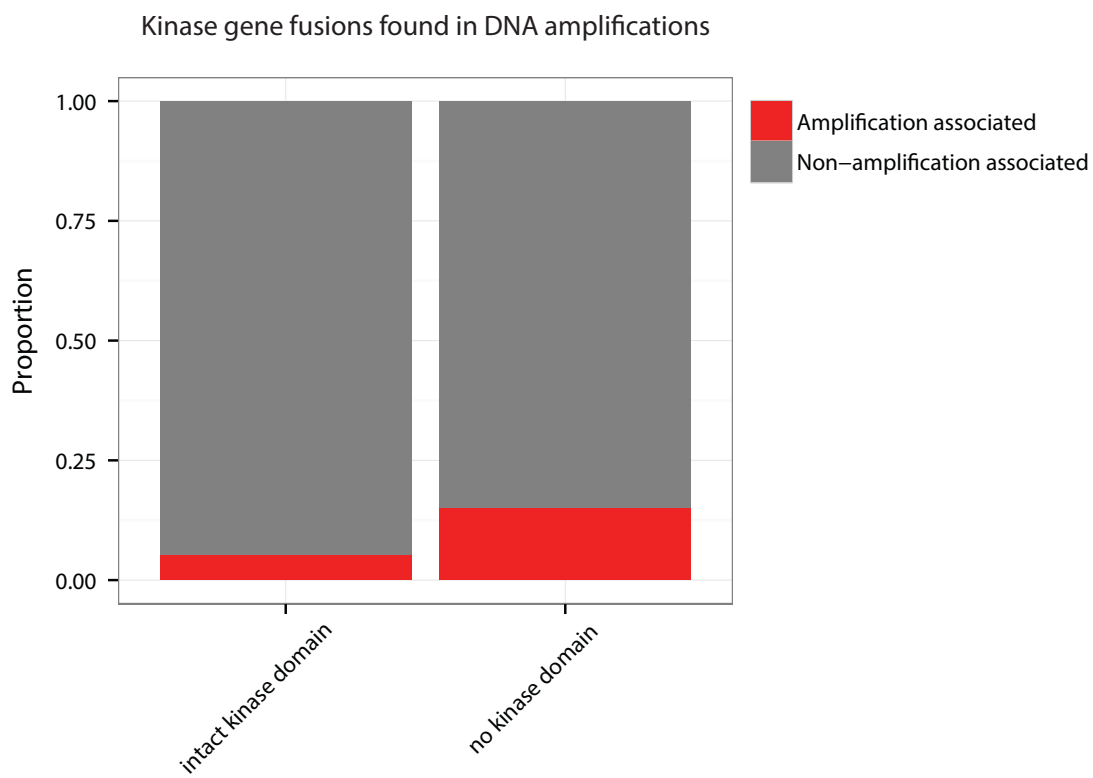

Proportional bar chart showing the proportion of amplification-associated fusions for kinases with either a functional kinase domain, or a truncated or absent kinase domain.

Supplementary Figure 15 – Overview of FGFR2 and FGFR3 fusion genes found in cell lines with complete or partial kinase domain.

FGFR fusions are found with multiple partners

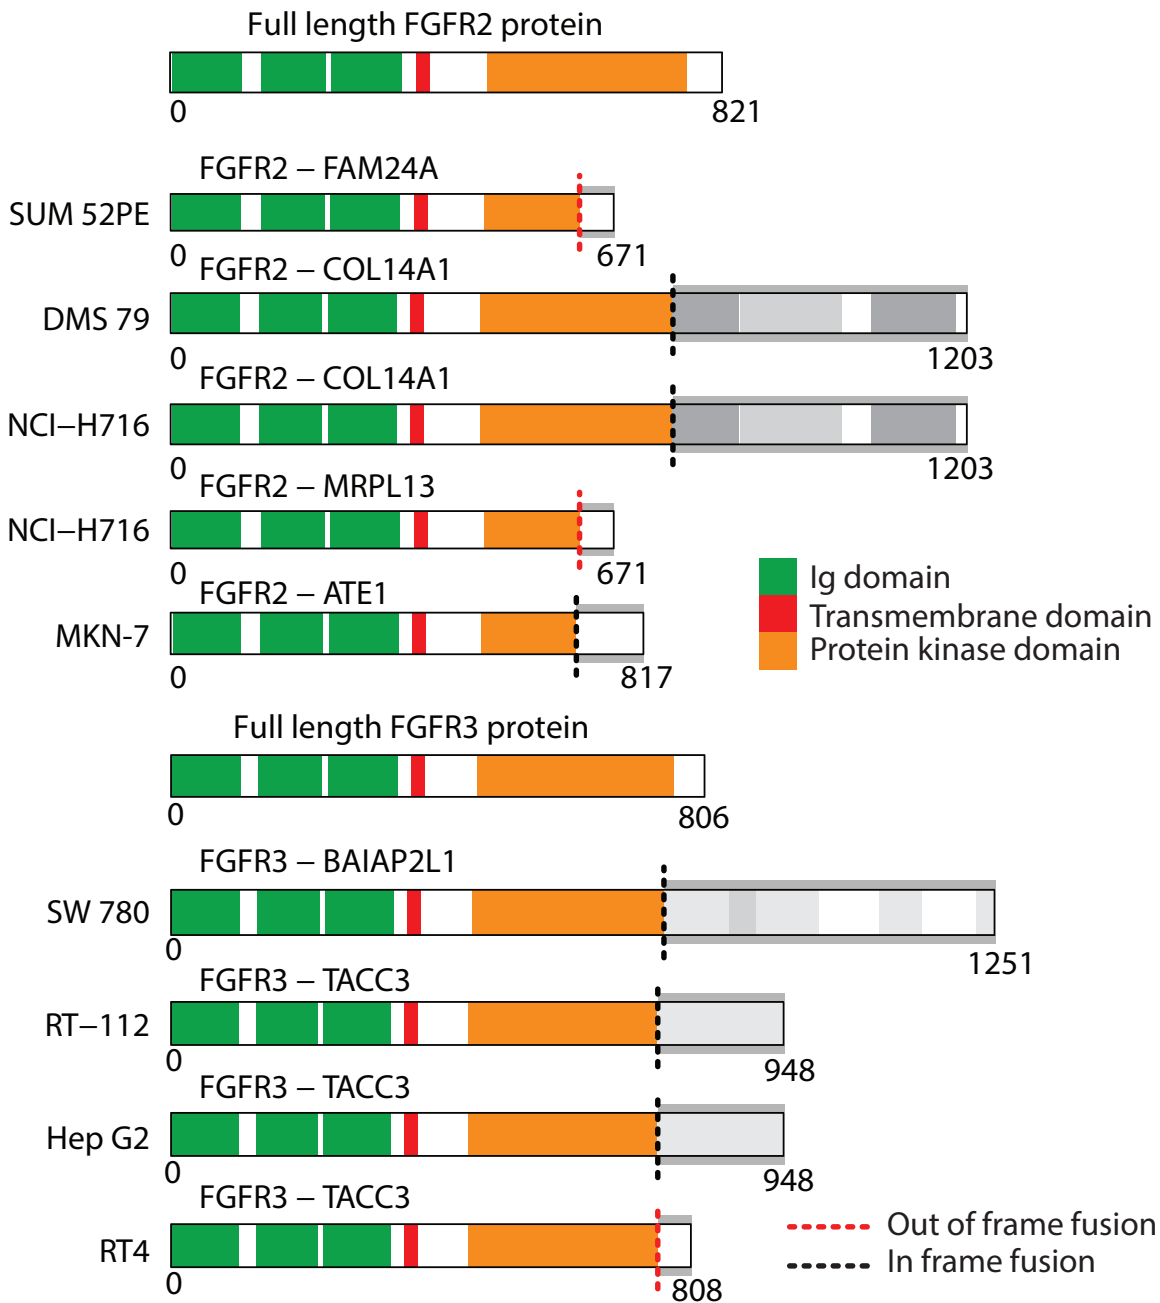

Schematic overview of fusions found involving FGFR2 and FGFR3 and containing at least part of the kinase domain (indicated in orange). The dotted lines indicate either an in-frame fusion (black dotted line) or an out-of-frame fusion (red dotted line).

Supplementary Figure 16 – Overview of RNA-seq variant filtering pipeline

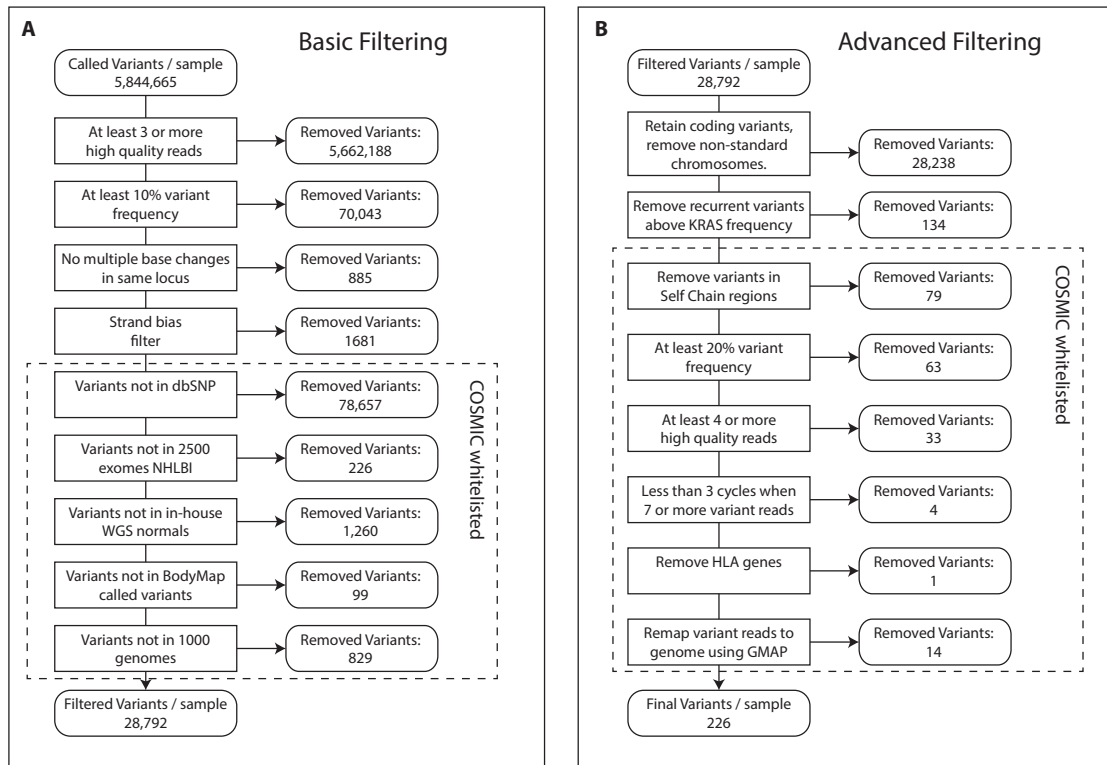

This Supplementary Figure shows our variant filtering pipeline for variants found in RNA-seq data. We use a two-step approach. We use basic filtering to exclude most common germline variants and sequencing error-derived variants. The advanced filtering results in a more stringent selection and results in the list finally used for the paper.



Supplementary Figure 17 – RNA-seq derived high confidence gene mutations

A

Overlapping mutation calls – GNE, Sanger and CCLE

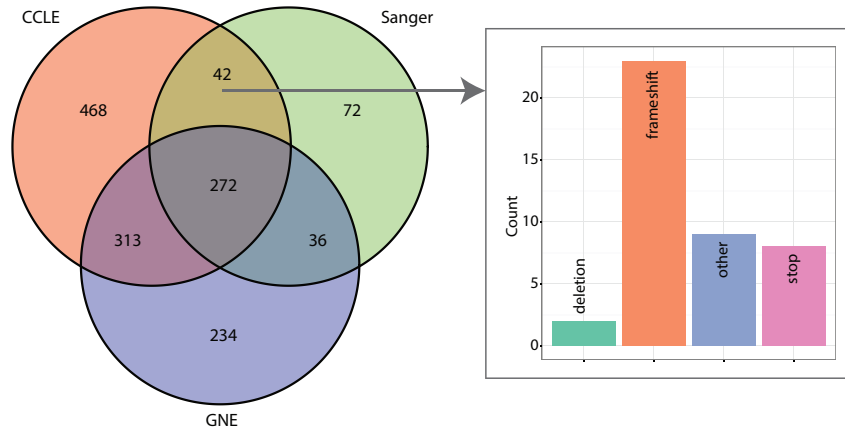

B

RNA-Seq-derived mutations per cell line tissue

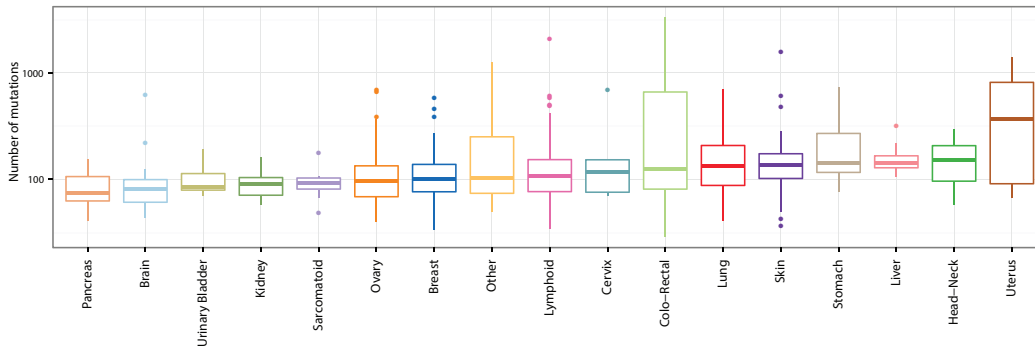

C

Top 30 mutated COSMIC genes in cell lines

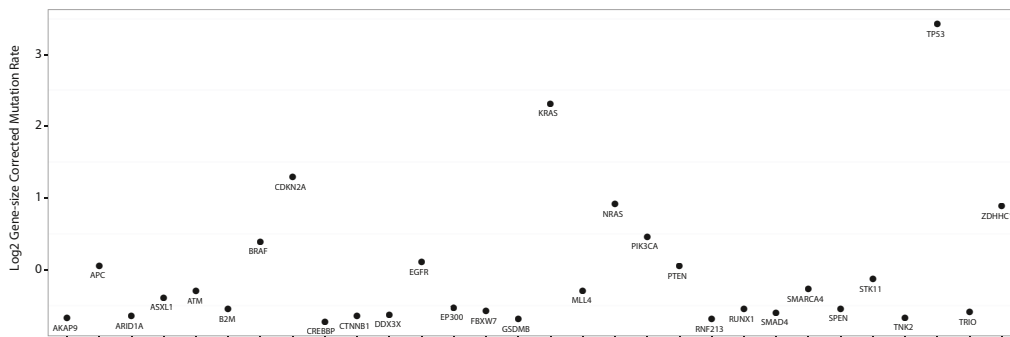

**A.** Venn diagram showing the overlap of mutations found by the CCLE, Sanger and Genentech mutation detection. Only genes for which all studies had data were included and overlap was performed on amino acid position and change. For the mutations missed by Genentech, but found by both CCLE and Sanger we show the nature and occurrence (inset graph). As can be seen, most missed mutations cover indels. **B.** Boxplot showing the distribution of high confidence mutations found in cell lines over tissue groups. **C.** Plot showing the gene-size corrected mutation rate for the top 30 most frequently mutated genes determined from RNA sequencing data in cancer cell lines. Only genes that have recorded mutations in the Catalogue of Somatic Mutations in Cancer (COSMIC) are shown.

*Supplementary Figure 18 – Pathway-based response prediction outperforms single gene predictors.*

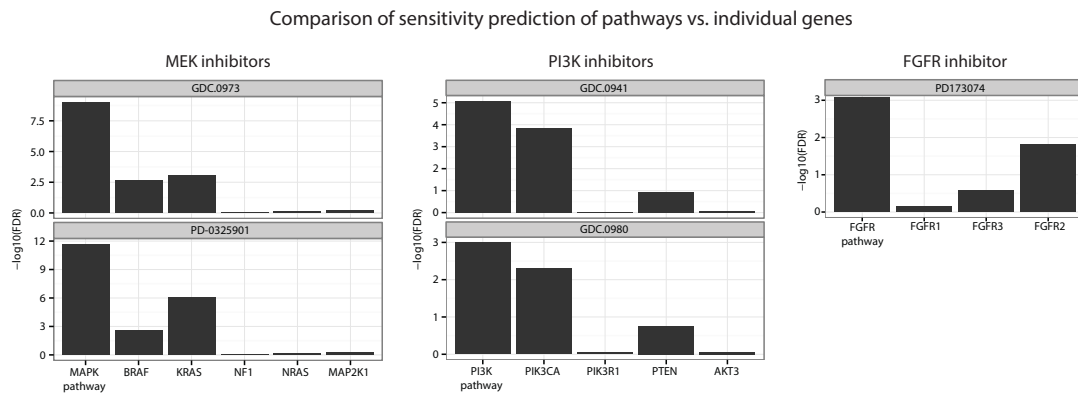

Barplots showing the predictive value of the aggregated aberration profiles on the sensitivity (in IC50) for MEK inhibitors GDC-973 and PD901, PI3K inhibitors GDC-941 and GDC-980, and the FGFR inhibitor PD173074. Y values denote the  $-\log_{10}$  False Discovery Rate for the Wilcoxon Rank Sum Test (corrected by Benjamini/Hochberg correction,  $n=12$  for MEK inhibitors,  $n=10$  for PI3K inhibitors and  $n=4$  for the FGFR inhibitor) of IC50s between aberrant and wildtype cell lines for the pathways or single genes shown on the x-axis.

## Supplementary Tables

Supplementary Table 3 – Resolution of genomic concordance among cell lines

| Cell line 1 | Cell line 2 | Concordance Score | Description                                                                                                                            | How To Resolve     | Cell Line Kept | Previously described      | Category |
|-------------|-------------|-------------------|----------------------------------------------------------------------------------------------------------------------------------------|--------------------|----------------|---------------------------|----------|
| 105KC       | JJ012       | 0.997             | Both are chondrosarcoma derived cell lines, but should be derived from different patients. This was an internal sample handling error. | Highest read count | JJ012          | No                        | mixup    |
| 501A        | 624 mel     | 0.998             | No evidence that they are from the same individual                                                                                     | Highest read count | 624 mel        | No                        | new      |
| C170        | HCT-15      | 0.998             | Known to be a part of a group of cross-contaminated cell lines (PMID: 9809040)                                                         | Highest read count | C170           | Reported by Sanger, ATCC  | known    |
| C170        | DLD-1       | 0.998             | Known to be a part of a group of cross-contaminated cell lines (PMID: 9809040)                                                         | Highest read count | C170           | Reported by Sanger, ATCC  | known    |
| C170        | HCT-8       | 0.993             | Known to be a part of a group of cross-contaminated cell lines (PMID: 9809040)                                                         | Highest read count | C170           | Reported by Sanger, ATCC  | known    |
| C32         | C32TG       | 0.993             | C32TG is a 6-thioguanine resistant clone of C32.                                                                                       | C32                | C32            | Reported by Sanger        | known    |
| Caco-2      | C2BBE1      | 0.992             | C2BBE1 is cloned from Caco-2 in 1988                                                                                                   | Highest read count | C2BBE1         | Reported ATCC             | known    |
| CHL-1       | COLO 699    | 0.966             | Probably derived from the same patient                                                                                                 | Highest read count | COLO 699       | Reported by Sanger, ECACC | known    |
| COLO 201    | COLO 205    | 0.990             | All three established from a pleural effusion in the same colon cancer patient                                                         | Highest read count | COLO 206F      | Reported by Sanger        | known    |
| COLO 201    | COLO 206F   | 0.985             | All three established from a pleural effusion in the same colon cancer patient                                                         | Highest read count | COLO 206F      | Reported by Sanger        | known    |
| COLO 205    | COLO 206F   | 0.993             | All three established from a pleural effusion in the same colon cancer patient                                                         | Highest read count | COLO 206F      | Reported by Sanger        | known    |
| COLO 800    | COLO-818    | 0.991             | COLO 800 and 794 are both from a 14 YO male, 818 is annotated to be from a 42 YO female. Discard 818, keep either 794 or 800           | Highest read count | COLO 794       | Reported by DSMZ, ECACC   | known    |
| COLO 800    | COLO 794    | 0.991             | COLO 800 and 794 are both from a 14 YO male, 818 is annotated to be from a 42 YO female. Discard 818, keep either 794 or 800           | Highest read count | COLO 794       | Reported by DSMZ, ECACC   | known    |
| COLO 829    | COLO 857    | 0.965             | Extracted from the same patient, different sites, name mismatches with vendor-quoted paper (PMID: 8402545) discard all                 | None               | None           | Reported by Sanger        | known    |
| COLO 829    | COLO 853    | 0.961             | Extracted from the same patient, different sites, name mismatches with vendor-quoted paper (PMID: 8402545) discard all                 | None               | None           | Reported by Sanger        | known    |
| COLO 853    | COLO 857    | 0.995             | Extracted from the same patient, different sites, name mismatches with vendor-quoted paper (PMID: 8402545) discard all                 | None               | None           | Reported by Sanger        | known    |
| COLO-818    | COLO 794    | 1.000             | COLO 800 and 794 are both from a 14 YO male, 818 is annotated to be from a 42 YO female. Discard 818, keep either 794 or 800           | Highest read count | COLO 794       | Reported by DSMZ, ECACC   | known    |
| COV413B     | COV413A     | 0.986             | Extracted from the same tumor                                                                                                          | Highest            | COV413B        | Derived from              | known    |

|          |           |       |                                                                                                                                                                                                   | read count         |           | same patient                               |       |
|----------|-----------|-------|---------------------------------------------------------------------------------------------------------------------------------------------------------------------------------------------------|--------------------|-----------|--------------------------------------------|-------|
| CX-1     | HT-29     | 0.987 | HT-29 and CX-1 seem to be from the same patient (annotated as colon carcinoma from a 44 YO female). WiDr should be from a 78 YO female, but SRT also shows as a derived from HT-29. Discard WiDr. | Highest read count | HT-29     | Reported by Sanger, ATCC                   | known |
| CX-1     | WiDr      | 0.984 | HT-29 and CX-1 seem to be from the same patient (annotated as colon carcinoma from a 44 YO female). WiDr should be from a 78 YO female, but SRT also shows as a derived from HT-29                | Highest read count | HT-29     | Reported by Sanger, ATCC, ICLAC            | known |
| DLD-1    | HCT-15    | 0.998 | Known to be a part of a group of cross-contaminated cell lines (PMID: 9809040)                                                                                                                    | Highest read count | C170      | Reported by Sanger, ATCC                   | known |
| DLD-1    | HCT-8     | 0.993 | Known to be a part of a group of cross-contaminated cell lines (PMID: 9809040)                                                                                                                    | Highest read count | C170      | Reported by Sanger, ATCC                   | known |
| EB1      | EB2       | 0.991 | Not known if officially from the same individual, isolated around the same time, both Burkitt's lymphoma                                                                                          | Highest read count | EB2       | Reported by Sanger                         | known |
| EFM-192A | EFM-192B  | 0.983 | All three established from a pleural effusion in the same breast cancer patient                                                                                                                   | Highest read count | EFM-192A  | Reported by DSMZ                           | known |
| EFM-192A | EFM-192C  | 0.973 | All three established from a pleural effusion in the same breast cancer patient                                                                                                                   | Highest read count | EFM-192A  | Reported by DSMZ                           | known |
| EFM-192B | EFM-192C  | 0.984 | All three established from a pleural effusion in the same breast cancer patient                                                                                                                   | Highest read count | EFM-192A  | Reported by DSMZ                           | known |
| G112     | G122      | 0.986 | Both were established at a different time. Possible contamination                                                                                                                                 | Highest read count | G122      | No                                         | new   |
| G118     | G142      | 0.997 | Established in the same lab, so either the same patient or contamination                                                                                                                          | Highest read count | G118      | No                                         | new   |
| G118     | G141      | 0.996 | Established in the same lab, so either the same patient or contamination                                                                                                                          | Highest read count | G118      | No                                         | new   |
| G142     | G141      | 0.993 | Established in the same lab, so either the same patient or contamination                                                                                                                          | Highest read count | G118      | No                                         | new   |
| G44      | G96       | 0.995 | Derived in the same lab, but should be from two different patients. Possible contamination                                                                                                        | Highest read count | G44       | No                                         | new   |
| GP2d     | GP5d      | 0.999 | Take from same primary tumor.                                                                                                                                                                     | Highest read count | GP2d      | No                                         | new   |
| GTL-16   | MKN-45    | 1.000 | GTL-16 is a subclone of MKN-45 (PMID: 1486568)                                                                                                                                                    | Highest read count | GTL-16    | Published                                  | known |
| H322T    | NCI-H322T | 0.992 | Same cell line, naming issue                                                                                                                                                                      | Highest read count | NCI-H322T | ATCC knows about this- no longer available | known |
| HCC2157  | HeLa      | 0.999 | likely HeLa contamination                                                                                                                                                                         | HeLa               | HeLa      | Reported                                   | known |
| HCC2157  | HEp-2     | 0.980 | likely HeLa contamination                                                                                                                                                                         | Highest read count | HeLa      | Reported by Sanger                         | known |

|           |           |       |                                                                                                                                                                                                                                                                                         |                    |           |                                 |       |
|-----------|-----------|-------|-----------------------------------------------------------------------------------------------------------------------------------------------------------------------------------------------------------------------------------------------------------------------------------------|--------------------|-----------|---------------------------------|-------|
| HCT 116   | ATRFLOX   | 1.000 | ATRFLOX is a derivative of ATCC Catalog No. CCL-247 (HCT 116) in which one copy of the ATR (ataxia telangiectasia related) gene has been disrupted, and the other allele has been fixed with lox sites flanking exon 2 making it susceptible to Cre deletion.                           | HCT 116            | HCT 116   | Reported by ATCC                | known |
| HCT-15    | HCT-8     | 0.993 | Known to be a part of a group of cross-contaminated cell lines (PMID: 9809040)                                                                                                                                                                                                          | Highest read count | C170      | Reported by Sanger, ATCC        | known |
| HeLa      | HEp-2     | 0.979 | likely HeLa contamination                                                                                                                                                                                                                                                               | HeLa               | HeLa      | Reported by Sanger              | known |
| Hep G2    | C3A       | 0.992 | C3A is a derivative of Hep G2, selected for strong contact inhibition of growth, high albumin production, high production of alpha fetoprotein (AFP) and ability to grow in glucose deficient medium.                                                                                   | Hep G2             | Hep G2    | Reported by ATCC                | known |
| HM7       | LS 174T   | 0.999 | HM-7 and LS 174T are known derivatives of colon cancer line LS 180. MT-3 is supposed to be a breast carcinoma line.                                                                                                                                                                     | LS 180             | LS 180    | Published                       | known |
| HM7       | LS 180    | 0.999 | HM-7 and LS 174T are known derivatives of colon cancer line LS 180. MT-3 is supposed to be a breast carcinoma line.                                                                                                                                                                     | LS 180             | LS 180    | Published                       | known |
| HPAC      | KCI-MOH1  | 0.983 | DSMZ "DNA fingerprinting and cytogenetic analysis showed cross-contamination with cell line STR profile matches 100% with DSMZ KCI-MOH1 and ATCC HPAC. 02/27/12 SS. HPAC which was established in 1985 from the pancreas adenocarcinoma of a 64-year-old Caucasian woman". 06/22/11 SS. | Highest read count | KCI-MOH1  | Reported by DSMZ                | known |
| Hs 69ST   | Hs 695T   | 0.993 | Hs 69ST is a typo, Hs 695T is the correct version                                                                                                                                                                                                                                       | Hs 695T            | Hs 695T   | No                              | mixup |
| HS-Sultan | Jiyoye    | 0.988 | HS-Sultan deposited with the ATCC as a plasmacytoma cell line, DNA fingerprinting has shown this line to be a derivative of Jiyoye (ATCC CCL-87), a Burkitt's lymphoma cell line.                                                                                                       | Jiyoye             | Jiyoye    | Reported by ATCC, ICLAC         | known |
| HT-29     | WiDr      | 1.000 | HT-29 and CX-1 seem to be from the same patient (annotated as colon carcinoma from a 44 YO female). WiDr should be from a 78 YO female, but SRT also shows as a derived from HT-29                                                                                                      | Highest read count | HT-29     | Reported by Sanger, ATCC, ICLAC | known |
| IM-95     | IM-95m    | 0.993 | IM-95m is a subclone of IM-95. Keep parental strain                                                                                                                                                                                                                                     | IM-95              | IM-95     | Reported JCRB                   | known |
| KMS-12-BM | KMS-12-PE | 0.968 | Extracted from the same patient, different sites                                                                                                                                                                                                                                        | Highest read count | KMS-12-BM | Reported by DSMZ                | known |
| KMS-28BM  | KMS-28PE  | 0.986 | Extracted from the same patient, different sites                                                                                                                                                                                                                                        | Highest read count | KMS-28BM  | CLIMA                           | known |
| KPL-1     | MCF-7     | 0.996 | KPL-1 shown to be cross-contaminated with MCF-7. Keep MCF-7                                                                                                                                                                                                                             | MCF-7              | MCF-7     | Reported by DSMZ, Sanger        | known |
| LS 180    | LS 174T   | 1.000 | HM-7 and LS 174T are known derivatives of colon cancer line LS                                                                                                                                                                                                                          | LS 180             | LS 180    | Reported by Sanger              | known |

|             |               |       |                                                                                                                                                                                                         |                    |             |                                                                      |       |
|-------------|---------------|-------|---------------------------------------------------------------------------------------------------------------------------------------------------------------------------------------------------------|--------------------|-------------|----------------------------------------------------------------------|-------|
|             |               |       | 180. MT-3 is supposed to be a breast carcinoma line, but is not in gCell.                                                                                                                               |                    |             |                                                                      |       |
| M059J       | M059K         | 0.984 | Isolated from the same patient                                                                                                                                                                          | Highest read count | M059K       | Reported by ATCC                                                     | known |
| MCF 10A     | MCF10DCIS.com | 0.991 | DCIS.com is propagated through xenograft. Keep parental                                                                                                                                                 | MCF 10A            | MCF 10A     | Published                                                            | known |
| MT-3        | LS 174T       | 0.998 | HM-7 and LS 174T are known derivatives of colon cancer line LS 180. MT-3 is supposed to be a breast carcinoma line.                                                                                     | LS 180             | LS 180      | Reported by Sanger                                                   | known |
| MT-3        | LS 180        | 0.998 | HM-7 and LS 174T are known derivatives of colon cancer line LS 180. MT-3 is supposed to be a breast carcinoma line.                                                                                     | LS 180             | LS 180      | Reported by Sanger                                                   | known |
| MT-3        | HM7           | 0.998 | HM-7 and LS 174T are known derivatives of colon cancer line LS 180. MT-3 is supposed to be a breast carcinoma line.                                                                                     | LS 180             | LS 180      | Reported by Sanger                                                   | known |
| NCI-H1155   | HCC12         | 0.992 | HCC12 is supposedly a liver cell line and H1155 a lung cancer cell line                                                                                                                                 | None               | None        | No                                                                   | new   |
| NCI-H2106   | NCI-H1770     | 0.981 | NCI-H1770 is annotated to be from a 57 YO individual and NCI-2106 from a 58 YO individual, possible clerical error in history?                                                                          | Highest read count | NCI-H1770   | Reported by Sanger                                                   | known |
| NCI-H2198   | NCI-H2196     | 0.993 | Same patient characteristics in ATCC                                                                                                                                                                    | Highest read count | NCI-H2198   | Reported by Sanger                                                   | known |
| NCI-H23     | HCC60         | 0.962 | HCC60 is supposedly Ovarian and NCI-H23 is annotated to be lung cancer                                                                                                                                  | None               | None        | No                                                                   | new   |
| OvCA 429    | OVCAR433      | 0.978 | OvCA433 and OvCA 429 have identical fingerprints. Communication with MDAnderson investigators indicates that there was likely a mix up at source. These lines should be regarded as of common ancestry. | Highest read count | OVCAR433    | No                                                                   | new   |
| PA-TU-8988T | PA-TU-8988S   | 0.986 | Extracted from the same patient, both from liver met (PMID: 1348891)                                                                                                                                    | Highest read count | PA-TU-8988T | Extracted from the same patient, both from liver met (PMID: 1348891) | known |
| PK-45H      | PK-45P        | 0.953 | Extracted from the same patient (10.1159/000015091)                                                                                                                                                     | Highest read count | PK-45P      | Reported by Riken                                                    | known |
| PSN1        | GR-M          | 0.983 | PSN1 is annotated as pancreatic, GR-M as melanoma. Possible mixup                                                                                                                                       | None               | None        | Reported by Sanger                                                   | known |
| RKO         | RKO-E6        | 0.993 | RKO-E6 is a transfected derivative of RKO. Keep the untransfected one.                                                                                                                                  | RKO                | RKO         | Reported by ATCC                                                     | known |
| SCLC-21H    | SCLC-22H      | 0.986 | Extracted from the same patient (10.1007/BF00389964), both effusions                                                                                                                                    | Highest read count | SCLC-22H    | Extracted from the same patient (10.1007/BF00389964), both effusions | known |
| SR-786      | SR            | 0.994 | Annotated as different types of lymphoma, and SR-786 is not in gCell, only in Biospecimen                                                                                                               | SR                 | SR          | Reported by DSMZ, Sanger, not ATCC                                   | known |

|           |             |       |                                                                                                                                                                                |                    |           |                                     |       |
|-----------|-------------|-------|--------------------------------------------------------------------------------------------------------------------------------------------------------------------------------|--------------------|-----------|-------------------------------------|-------|
| SUM 149PT | SUM 229PE   | 1.000 | Supposedly isolated from different patients in the same lab. (PMID: 10604729). This was a vendor mix up. Their early stocks were mixed up and they have since corrected this.  | SUM 149PT          | SUM 149PT | No                                  | mixup |
| SW 480    | SW 527      | 0.972 | SW480 is primary colon, SW620 a linked metastasis, SW527 is annotated a a breast cancer cell line. Keep parental tumor                                                         | SW 480             | SW 480    | Reported by Sanger, ICLAC, not ATCC | known |
| SW 620    | SW 527      | 0.971 | SW480 is primary colon, SW620 a linked metastasis, SW527 is annotated a a breast cancer cell line. Keep parental tumor                                                         | SW 480             | SW 480    | Reported by Sanger, ICLAC, not ATCC | known |
| SW 620    | SW 480      | 0.959 | SW480 is primary colon, SW620 a linked metastasis, SW527 is annotated a a breast cancer cell line. Keep parental tumor                                                         | SW 480             | SW 480    | Reported by Sanger, ATCC            | known |
| TYK-nu    | TYK-nu.CP-r | 0.999 | CP-r is a cisplatin resistant clone of TYK-nu. Keep non resistant.                                                                                                             | TYK-nu             | TYK-nu    | Reported JCRB                       | known |
| WM-115    | WM-266-4    | 1.000 | WM-115 is from the primary tumor, WC-266-4 from the metastasis. Keep the primary                                                                                               | WM-115             | WM-115    | Reported by ATCC                    | known |
| YMB-1     | YMB-1-E     | 1.000 | ZR-75-1 has been described in the literature before YMB-1 and its (possibly related) cell line YMB-1E. The establishment of those two is published in a Japanese journal only. | Highest read count | YMB-1     | Published                           | known |
| ZR-75-1   | YMB-1       | 0.993 | ZR-75-1 has been described in the literature before YMB-1 and its (possibly related) cell line YMB-1E. The establishment of those two is published in a Japanese journal only. | Highest read count | YMB-1     | Reported by Sanger                  | known |
| ZR-75-1   | YMB-1-E     | 0.993 | ZR-75-1 has been described in the literature before YMB-1 and its (possibly related) cell line YMB-1E. The establishment of those two is published in a Japanese journal only. | Highest read count | YMB-1     | Reported by Sanger                  | known |

Supplementary Table 5 – Significantly differentially expressed lincRNAs between Epithelial and Mesenchymal cell lines

| lincrna         | mean expression mesenchymal | mean expression epithelial | fold change | adjusted p-value |
|-----------------|-----------------------------|----------------------------|-------------|------------------|
| ENSG00000229813 | 1.69                        | 28.82                      | 17.04       | 0.01             |
| ENSG00000230812 | 42.47                       | 3.28                       | 0.08        | 0.01             |
| ENSG00000237352 | 6.09                        | 0.47                       | 0.08        | 0.01             |
| ENSG00000224968 | 0.03                        | 1.26                       | 41.75       | 0.01             |
| ENSG00000203635 | 3.58                        | 45.61                      | 12.73       | 0                |
| ENSG00000242136 | 2.29                        | 34.73                      | 15.14       | 0                |
| ENSG00000225649 | 12.24                       | 0.68                       | 0.06        | 0                |
| ENSG00000231826 | 4.04                        | 88.54                      | 21.92       | 0                |
| ENSG00000235491 | 0.03                        | 1.84                       | 68.35       | 0                |
| ENSG00000243081 | 0.22                        | 3.46                       | 16.1        | 0.01             |
| ENSG00000244541 | 1.38                        | 16.5                       | 11.97       | 0.01             |
| ENSG00000223783 | 1.03                        | 16.31                      | 15.77       | 0                |
| ENSG00000224652 | 2.68                        | 50.45                      | 18.84       | 0                |
| ENSG00000251152 | 0.91                        | 17.4                       | 19.1        | 0.01             |
| ENSG00000250846 | 176                         | 4.39                       | 0.02        | 0                |
| ENSG00000248479 | 15.25                       | 0.51                       | 0.03        | 0                |
| ENSG00000248771 | 4.77                        | 106.28                     | 22.3        | 0                |
| ENSG00000250266 | 0.4                         | 26.82                      | 67.71       | 0                |
| ENSG00000248464 | 9.77                        | 0.63                       | 0.06        | 0.01             |
| ENSG00000249984 | 4.96                        | 0.13                       | 0.03        | 0                |
| ENSG00000249669 | 26.76                       | 1.43                       | 0.05        | 0.01             |
| ENSG00000233834 | 9.77                        | 150.24                     | 15.37       | 0                |
| ENSG00000226097 | 0.48                        | 6.14                       | 12.89       | 0.01             |
| ENSG00000253324 | 0.65                        | 12.28                      | 18.86       | 0.01             |
| ENSG00000236938 | 4.19                        | 0.21                       | 0.05        | 0                |
| ENSG00000234520 | 17.42                       | 1.14                       | 0.07        | 0                |
| ENSG00000243416 | 4.99                        | 0.41                       | 0.08        | 0.01             |
| ENSG00000254153 | 0.37                        | 16.38                      | 44.85       | 0                |
| ENSG00000203499 | 155.98                      | 3330.25                    | 21.35       | 0                |
| ENSG00000254973 | 5.44                        | 72.96                      | 13.4        | 0                |
| ENSG00000234323 | 31.37                       | 1.7                        | 0.05        | 0                |
| ENSG00000230417 | 23.32                       | 1.14                       | 0.05        | 0                |
| ENSG00000203434 | 9.19                        | 0.77                       | 0.08        | 0                |
| ENSG00000230834 | 2.26                        | 30.98                      | 13.7        | 0.01             |
| ENSG00000255257 | 0.95                        | 12.01                      | 12.65       | 0                |
| ENSG00000250230 | 0.95                        | 13.84                      | 14.61       | 0.01             |
| ENSG00000255774 | 9.8                         | 134.28                     | 13.71       | 0.01             |
| ENSG00000256218 | 0.32                        | 4.91                       | 15.27       | 0                |
| ENSG00000214039 | 2.76                        | 135.8                      | 49.2        | 0                |
| ENSG00000233124 | 0.22                        | 3.42                       | 15.72       | 0                |
| ENSG00000229520 | 1.14                        | 23.24                      | 20.34       | 0                |
| ENSG00000224243 | 1.82                        | 37.84                      | 20.82       | 0                |
| ENSG00000258630 | 0.1                         | 1.62                       | 16.69       | 0.01             |
| ENSG00000214548 | 3599.86                     | 212.96                     | 0.06        | 0                |
| ENSG00000258399 | 36.63                       | 3.51                       | 0.1         | 0                |
| ENSG00000225746 | 35.9                        | 4.64                       | 0.13        | 0.01             |
| ENSG00000258647 | 0.46                        | 10.19                      | 21.92       | 0                |
| ENSG00000167117 | 1.44                        | 84.54                      | 58.52       | 0                |
| ENSG00000183566 | 0.2                         | 12.88                      | 65.7        | 0                |
| ENSG00000233017 | 0.24                        | 7.18                       | 30.21       | 0                |
| ENSG00000230978 | 0.15                        | 3.71                       | 24.06       | 0                |
| ENSG00000205622 | 0.75                        | 8.9                        | 11.89       | 0.01             |
| ENSG00000232806 | 0.03                        | 1.69                       | 53.71       | 0.01             |
| ENSG00000238195 | 3.95                        | 0.1                        | 0.03        | 0                |
| ENSG00000233521 | 116.31                      | 4.82                       | 0.04        | 0                |
| ENSG00000225882 | 1.42                        | 18.73                      | 13.19       | 0                |



*Supplementary Table 9 – TCGA samples analyzed for fusions*

| TCGA indication | Samples Analysed | Samples with a fusion | % sample with fusion |
|-----------------|------------------|-----------------------|----------------------|
| ACC             | 79               | 32                    | 40.5                 |
| BLCA            | 211              | 133                   | 63                   |
| BRCA            | 991              | 632                   | 63.8                 |
| CESC            | 144              | 72                    | 50                   |
| COAD            | 419              | 162                   | 38.7                 |
| DLBC            | 27               | 11                    | 40.7                 |
| GBM             | 169              | 97                    | 57.4                 |
| HNSC            | 398              | 227                   | 57                   |
| KICH            | 66               | 14                    | 21.2                 |
| KIRP            | 649              | 138                   | 21.3                 |
| LAML            | 123              | 56                    | 45.5                 |
| LGG             | 297              | 123                   | 41.4                 |
| LIHC            | 147              | 78                    | 53.1                 |
| LUAD            | 504              | 298                   | 59.1                 |
| LUSC            | 457              | 277                   | 60.6                 |
| OV              | 306              | 284                   | 92.8                 |
| PAAD            | 55               | 22                    | 40                   |
| PRAD            | 247              | 167                   | 67.6                 |
| READ            | 157              | 71                    | 45.2                 |
| SARC            | 105              | 75                    | 71.4                 |
| SKCM            | 355              | 194                   | 54.6                 |
| STAD            | 191              | 166                   | 86.9                 |
| THCA            | 499              | 152                   | 30.5                 |
| UCEC            | 544              | 227                   | 41.7                 |

*Supplementary Table 12 – Cancer-related pathways with member genes that are known to be functionally altered in cancer.*

| Pathway Name                         | Genes In Pathway                                                  |
|--------------------------------------|-------------------------------------------------------------------|
| PI3K                                 | PIK3CA, PTEN, PIK3R1, AKT1, AKT3                                  |
| MAPK                                 | KRAS, NRAS, BRAF, MAP2K1, NF1                                     |
| WNT                                  | APC, CTNNB1, AXIN1, AXIN2                                         |
| RTK                                  | EGFR, ERBB2, MET, ALK, JAK2, RET, ROS1, FGFR1, FGFR2, PDGFR, CRKL |
| FGFR                                 | FGFR1, FGFR2, FGFR3                                               |
| P53                                  | TP53, MDM2                                                        |
| NOTCH                                | NOTCH1, NOTCH2, NOTCH3                                            |
| TGFB                                 | SMAD2, SMAD4, TGFB2                                               |
| Cell cycle                           | CDKN2A, CDKN2B, CCND1, CCNE1, CDKN1B                              |
| TOR                                  | STK11, TSC1, TSC2                                                 |
| SWI/SNF                              | SMARCA1, SMARCA4, ARID1A, ARID2, ARID1B, PBRM1                    |
| Lineage transcription factors        | MITF, NKX2-1, SOX2, ERG, ETV1, CDX2                               |
| MYC                                  | MYC                                                               |
| Apoptosis                            | BCL2A1, BCL2L1, MCL1                                              |
| Chromatin histone acetyltransferases | CREBBP, EP300                                                     |
| Chromatin histone methyltransferases | MLL, MLL2, MLL3, EZH2, NSD1, WHSC1L1                              |
| Chromatin histone demethylases       | KDM6A, KDM5A, KDM5C                                               |
| Protein metabolism                   | SPOP, FBXW7, WWP1, FAM46C, XBP1                                   |
| Splicing                             | SF3B1, U2AF1, SFRS1, SFRS7, SF3A1, ZRSR2, SRSF2, U2AF2, PRPF40B   |
| Metabolism                           | IDH1, IDH2                                                        |
| DNA repair                           | MSH2, MSH3, MSH6, ATM, MLH1                                       |

## Supplementary Notes

### *Supplementary note 1: PICNIC algorithm adjustments*

PICNIC was designed to work only with the Affymetrix SNP 6.0 array and thus required modification to work with the Illumina arrays. The segment initialization component was replaced with the CBS algorithm<sup>66</sup>. The prior distribution of “alpha”, the raw copy number signal expected when zero copies of a SNP are present, was altered to have a mean of 0.7 with a standard deviation of 0.05. The prior distribution for overall ploidy was expanded in its right tail to allow for ploidy values > 3.5. Population allele frequencies were calculated from 159 normal samples<sup>31</sup>, and in this work, were supplemented with 10 pseudocounts for each allele to avoid “impossible” HMM states, which otherwise would lead to spurious single-SNP segments. Adapting PICNIC to Illumina arrays also required a new method to transform the raw allele-specific signal intensities into normalized values appropriate for PICNIC’s HMM strategy. The new per-SNP normalization method is as follows:

### **Final estimation strategy**

The hidden Markov model used for copy number inference requires that two-dimensional probe intensity data for each SNP be transformed so that the normal AA, AB, and BB genotype centroids are separated by one unit in both the horizontal and vertical directions. To achieve this, we first used a Bayesian model to estimate cluster centroids for each SNP using 159 normal samples, and then applied a smooth, non-linear transform to send each centroid to the appropriate location.

### **Bayesian model**

For SNP  $k$  and genotype  $g$ , observed data in normal samples were modeled as following a bivariate Gaussian distribution with mean  $\mu_{AA}^{(k)}$  and covariance  $\Sigma_g^{(k)}$ . The  $\mu_{AA}^{(k)}$ ,  $\mu_{AB}^{(k)}$ , and  $\mu_{BB}^{(k)}$  were observed to be strongly positively correlated. (If one cluster was further from the origin than usual for a given SNP, other clusters for that SNP were highly likely to be further from the origin as well.) To take advantage of this, cluster centers were modeled jointly by a 6-dimensional Gaussian distribution, with mean  $\mu$  and covariance  $\Sigma$ .  $\mu$  was treated as a hyperparameter;  $\Sigma$  was modeled as inverse Wishart with two hyperparameters: scale matrix  $V_\mu$  and degrees of freedom  $d_\mu$ . The  $\Sigma_g^{(k)}$  were modeled as scaled inverse Wishart, each with a corresponding  $V_g$  scale matrix, but with common degrees of freedom  $d$ .

### **Hyperparameter specification**

Hyperparameters were set empirically using a training set of 156 normal samples that included the matched normal from our cancer patients.  $\mu$  was set to the global average in the training data, with weighting to adjust for differing numbers of observations from SNP to SNP for a given genotype. The  $V_\mu$ ,  $V_{AA}$ ,  $V_{AB}$ , and  $V_{BB}$  were constructed similarly. (To estimate  $V_\mu$ , only SNPs with at least three observations in each genotype cluster were used.)  $d$  and  $d_\mu$  were manually tuned to provide satisfactory results for a wide range of probe behavior and minor allele frequencies.

### Non-linear transformation of centroids

To account for the fact that in the training data, probe response was observably non-linear with respect to true underlying copy number, signal for SNP  $k$  (for the A and B alleles separately) was transformed with a non-linear function:  $y = \alpha_k x^{\gamma_k} + \beta_k$ . For each SNP, the  $\alpha_k$ ,  $\beta_k$  and  $\gamma_k$  were selected based on the posterior distributions computed above, so that 0, 1, or 2 true underlying copies of a given allele mapped to 1, 2, or 3, as required by the hidden Markov model.

### Per-gene copy number

We used per-gene averaging to determine the total copy number per gene in each cell line. We calculated the ploidy-corrected copy number ( $CN_{pc}$ ) per gene as follows:

$$CN_{pc} = \frac{CN_{total}}{ploidy} - 1$$

We called amplified genes as  $> 1 CN_{pc}$  and deleted genes as  $< -0.75 CN_{pc}$ . As an example for a tetraploid (4n) cell line the ploidy corrected copy number of 1 or higher corresponds to 8 or more DNA copies and a corrected copy number of  $-0.75$  or less corresponds to less than 1 copy.
